# Supplementary material for: Inbred lab mice are not isogenic: genetic variation within inbred strains used to infer the mutation rate per nucleotide site
Source: PubMed Central journal article supplement (PMC7852876; doi:10.1038/s41437-020-00361-1), 2020-08-31
Supplement: 41437_2020_361_MOESM1_ESM.pdf [file 41437_2020_361_MOESM1_ESM.pdf]

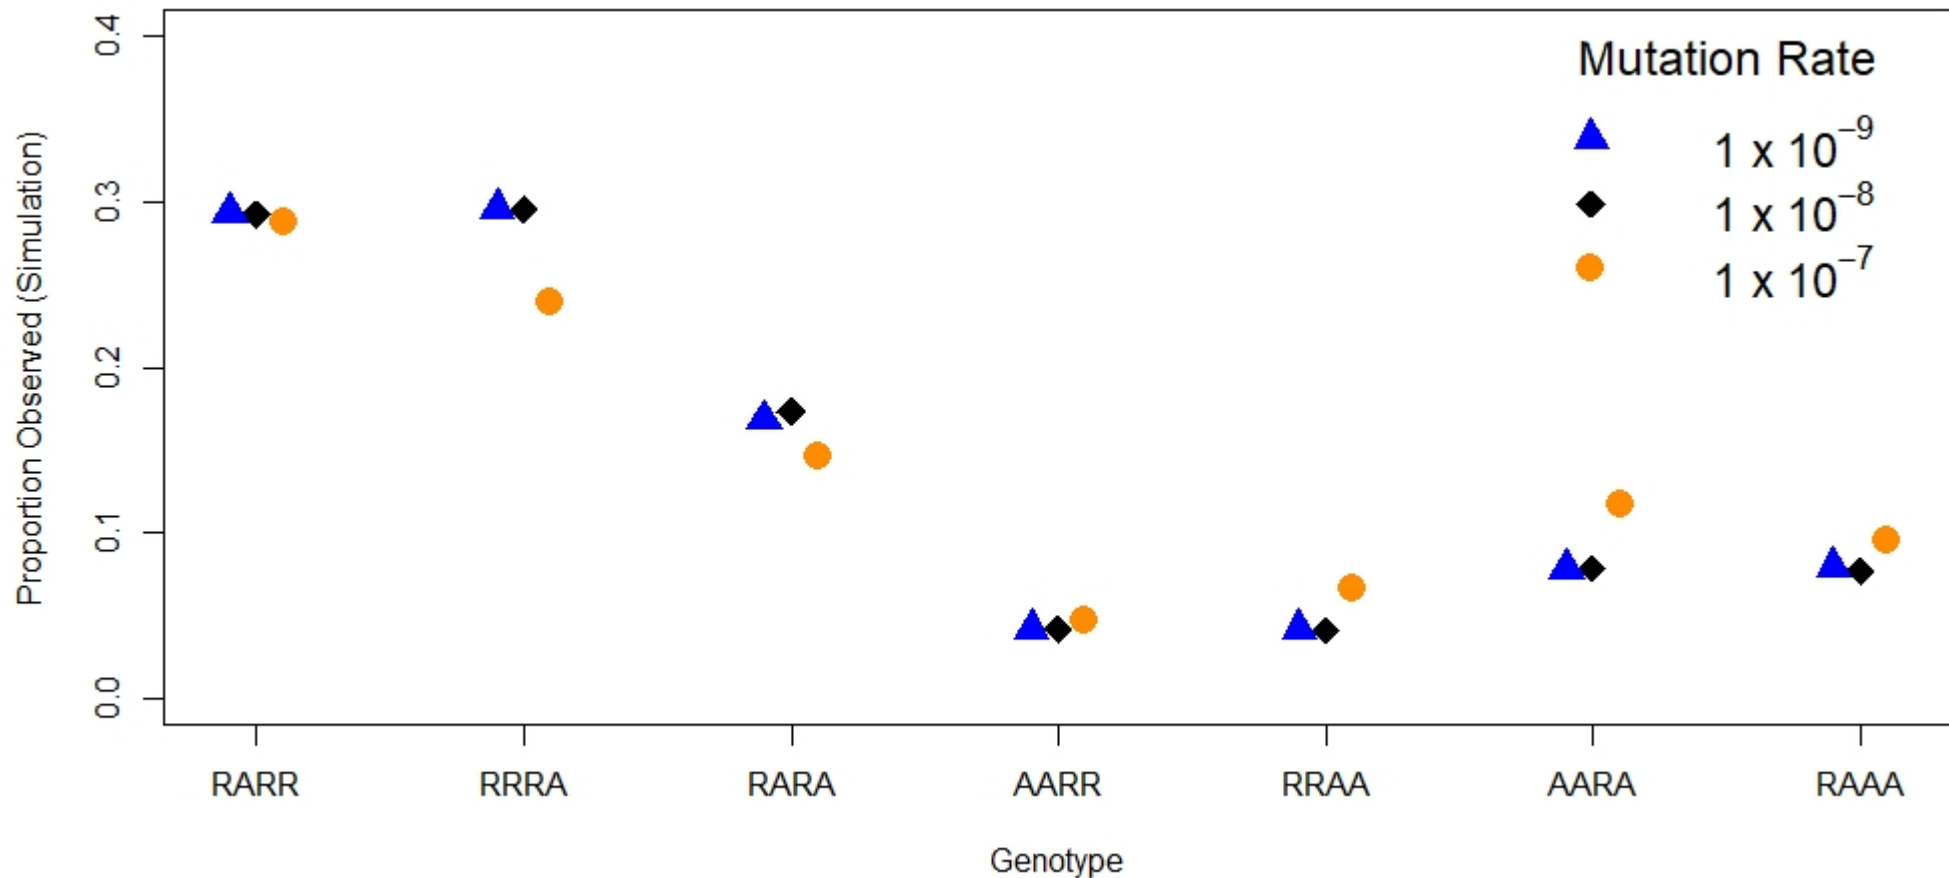

**Supplemental Figure 1:** Average proportion of variant sites in each SFS element after 100 generations in simulations in which mutation rate parameter values are varied. Parameter values include the value used in this study ( $10^{-8}$ ), and values one order of magnitude smaller and greater.

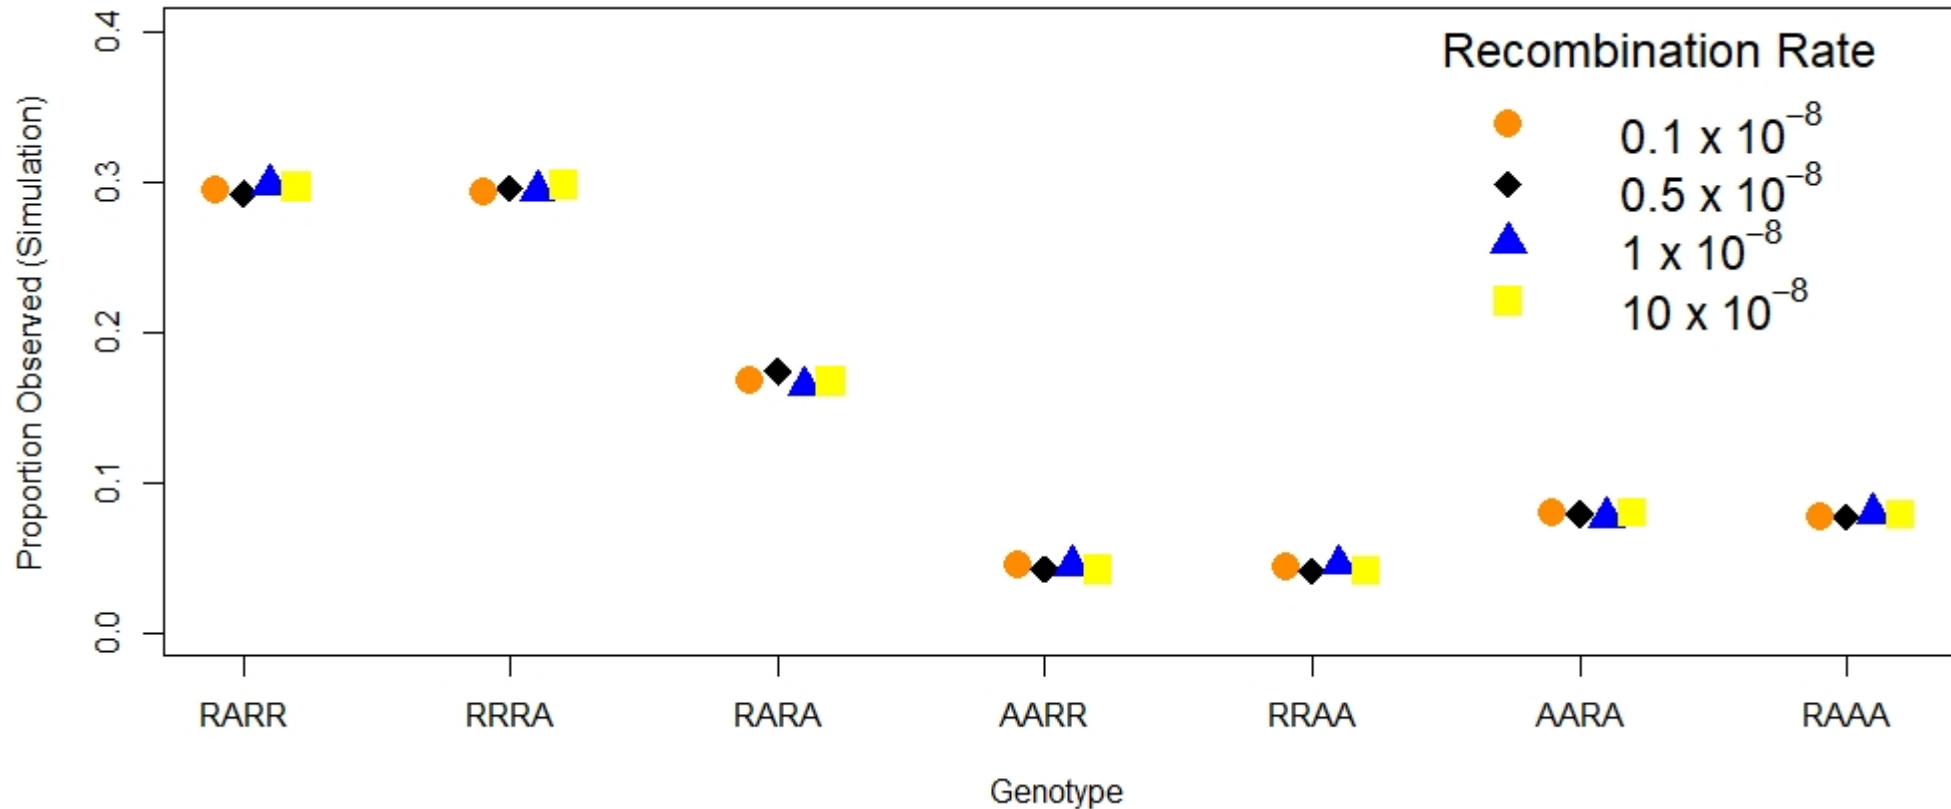

**Supplemental Figure 2:** Average proportion of variant sites in each SFS element after 100 generations in simulations in which recombination rate parameter values are varied. Parameter values include the value used in this study ( $0.5 \times 10^{-8}$ ) as well as lower and greater values.

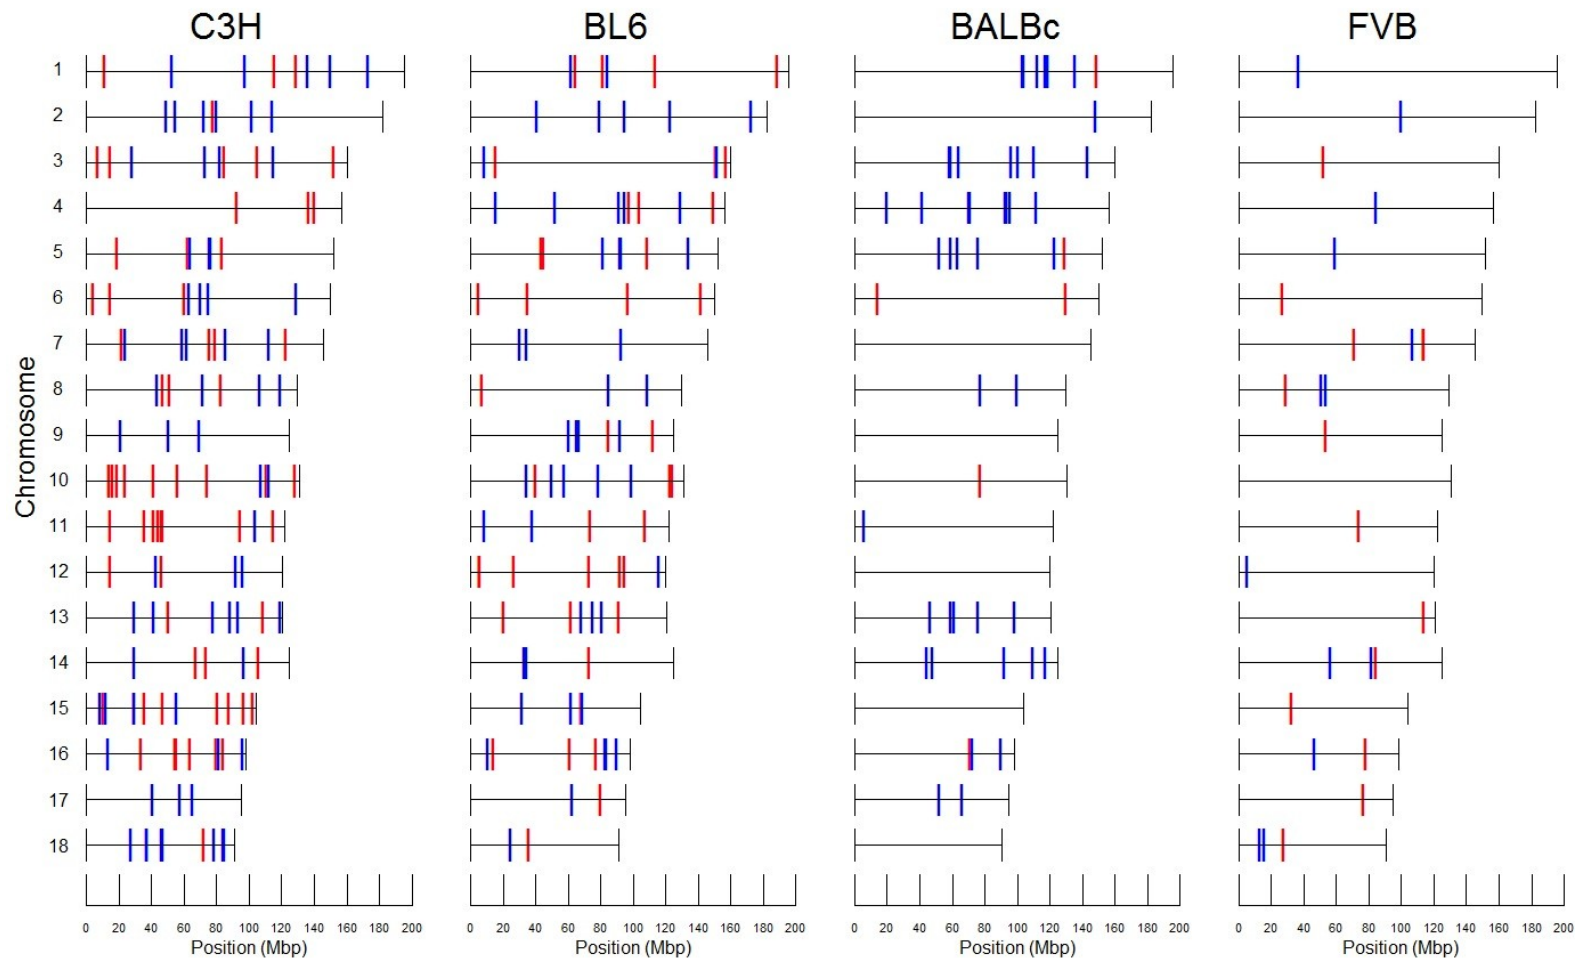

**Supplemental Figure 3:** Observed SNMs (post IGV check) across the genome in the four strains.

**Supplemental Table 1. Mean sequence mapping quality for each sample.**

| <b>Sample</b> | <b>Mean MAPQ</b> |
|---------------|------------------|
| C3H A         | 59.03            |
| C3H B         | 59.06            |
| BL6 A         | 58.69            |
| BL6 B         | 58.64            |
| BALBc A       | 58.94            |
| BALBc B       | 58.91            |
| FvB A         | 58.88            |
| FvB B         | 58.66            |

## Supplemental Table 2. Site counts during filtering process

| Criterion | Filter                                                              | Number of Sites      | % Initial |
|-----------|---------------------------------------------------------------------|----------------------|-----------|
| Initial   | None                                                                | 2,401,196,940        | 100       |
| 1 and 2   | QUAL>90, DP>10                                                      | 2,064,599,209        | 85.98     |
| 3         | Bait mice < 1 variant reads                                         | 1,602,887,415        | 66.75     |
| 4         | Non-focal mice < variant reads                                      | 1,543,509,803        | 64.28     |
| 5         | Segregating sites in focal mice only                                | 30,499               | 1.27E-03  |
| 6         | Single nucleotide variant                                           | 8,648                | 3.60E-04  |
| 7 to 11   | Manual filters for false positives on sample of sites (see methods) | 1,984.45 (estimated) | 8.26E-05  |
